# Supplementary material for: Comparative analysis of the complete plastid genomes of Mangifera species and gene transfer between plastid and mitochondrial genomes
Source: PeerJ. 2021 Feb 10;9:e10774. doi: 10.7717/peerj.10774 (PMC7881718; doi:10.7717/peerj.10774)
Supplement: Supplemental Information 13 [file peerj-09-10774-s013.xlsx]

## Sheet: Sheet1
% identity	alignment length	mismatches	gap opens	q. start	q. end	s. start	s. end	evalue	bit score
99.778	5400	4	1	86031	91430	583260	588651	0	9899
99.917	4791	4	0	25357	30147	467911	463121	0	8826
100	4757	0	0	153024	157780	588651	583895	0	8785
99.895	3814	0	3	57605	61418	492681	496490	0	7018
99.342	3648	4	9	65656	69300	424983	428613	0	6586
99.839	3100	1	2	38797	41892	649401	652500	0	5694
100	2010	0	0	20912	22921	392190	390181	0	3712
99.944	1778	1	0	11280	13057	97645	95868	0	3278
99.228	1684	1	3	63482	65165	181016	179345	0	3027
100	1574	0	0	91216	92789	852889	851316	0	2907
100	1574	0	0	151665	153238	851316	852889	0	2907
99.869	1522	2	0	23936	25457	828869	827348	0	2800
